# Supplementary material
Source: publisher figshare collection journal article supplement (https://gsajournals.figshare.com/ndownloader/files/15230723)
Supplement: Supplementary file 1 [file 15230723]

## Sheet: Sheet1
Table S2: Table of genome size estimates.
Sophophora							Drosophila
Species	Sex	GS (Mbp)	S.E.	N	Chrom.	Stock	Species	Sex	GS (Mbp)	S.E.	N	Chrom.	Stock
D. affinis H	Female	208.1	0.96	5	1N=5	14012-0141.00	D. acanthoptera +	Female	155.8	0.95	10	1N=5	15090-1693.00
	Male	184.8	1.58	5				Male	145.6	1.55	7
	Sex Diff****	46.6	p = 0.0001					Sex Diff****	20.4	p = 0.0001
D. algonquin H	Female	205.2	0.53	5	1N=5	14012-0161.00	D. albomicans +	Female	215.922	1.64755	5	1N=3	15112-1751.04
	Male	194.2	1.34057	6				Male	220.607	1.29291	5
	Sex Diff****	22	p = 0.0001					Sex Diff*	-9.36961	p = 0.01538
D. ambigua H	Female	188.4	1.07	5	1N=5	14013-1011.00	D. anceps +	Female	201.8	0.38	5	1N=6	15081-1261.02
	Male	176.5	0.97	6				Male	207.5	0.66	5
	Sex Diff****	23.8	p = 0.0001					Sex Diff*	-11.4	p = 0.0065
D. ananassae +	Female	205.1	1.6	6	1N=4	14024-0371.11	D. arawakana +	Female	181.1	0.92	5	1N=4	15182-2261.03
	Male	198.6	1.1	5				Male	186.4	0.55	5
	Sex Diff***	13	p = 0.0005					Sex Diff**	-5.3	p = 0.0055
D. atripex H	Female	198.2	0.81	7	1N=4	14024-0361.00	D. arizonae +	Female	175.4	1.00879	5		15081-1271.14
	Male	194.8	1.53193	5				Male	173.9	0.664025	5
	Sex Diff	6.8	p = 0.0957					Sex Diff	3	p = 0.1242
D. auraria H	Female	254.4	1.44	5	1N=4	14028-0471.00	D. borealis +	Female	257.8	1.29	5	1N=6	15010-0961.00
	Male	248.4	1.16402	5				Male	261.5	0.7	5
	Sex Diff***	12	p = 0.0021					Sex Diff	-7.4	p = 0.0619
D. azteca H	Female	202.2	2.04	5	1N=5	14012-0171.02	D. bromeliae +	Female	145.2	1.77	5	1N=4	15085-1682.00
	Male	192.2	1.09	5				Male	137.5	0.52	5
	Sex Diff****	20	p = 0.0001					Sex Diff****	7.7	p = 0.0001
D. baimaii H	Female	279.2	0.78	5	1N=4	14028-0481.00	D. busckii H	Female	134.7	0.726785	5	1N=4	13000-0081.00
	Male	273.6	1.19431	6				Male	136.5	0.566659	5
	Sex Diff**	11.2	p = 0.0025					Sex Diff	-1.8	p = 0.3423
D. barbarae +	Female	289.6	2.4	4	1N=4	14028-0491.01	D. buzzatii +	Female	179.9	1.25	5	1N=6	15081-1291.01
	Male	279.2	0.6	5				Male	169	0.58	5
	Sex Diff****	20.8	p = 0.0001					Sex Diff****	21.8	p = 0.0001
D. biauraria G	Female	237.165	11.736	4	1N=3	-	D. cardini +	Female	215.7	1.12	5	1N=6	15181-2181.03
	Male	211.248	10.758	2				Male	212.5	0.4	5
	Sex Diff****	51.834	p = 0.0001					Sex Diff	3.2	p = 0.0946
D. bicornuta H	Female	245	1.01	5	1N=3	14028-0511.00	D. dunni +	Female	286.1	1.69	5	1N=5	15182-2291.00
	Male	226.6	0.85	5				Male	287	1.04	5
	Sex Diff****	36.8	p = 0.0001					Sex Diff	-0.9	p = 0.6275
D. bifasciata H	Female	210.6	1.11	5	1N=5	14012-0181.02	D. eohydei +	Female	231	0.93	5	1N=6	15085-1631.00
	Male	196.2	2	5				Male	218.7	0.56	5
	Sex Diff****	28.8	p = 0.0001					Sex Diff****	24.6	p = 0.0001
D. bipectinata +	Female	213	0.8	5	1N=4	14024-0381.07	D. euronotus +	Female	176.8	0.75	5	1N=5	15030-1131.01
	Male	208.9	0.5	5				Male	174.3	0.78	5
	Sex Diff	8.2	p = 0.0391					Sex Diff	2.5	p = 0.1831
D. birchii G	Female	191.226	0.978	3	1N=4	-	D. ezoana +	Female	192.9	1.3	5	1N=6	15010-0971.00
	Male	190.415	0.978	3				Male	197.9	0.71	5
	Sex Diff	1.62226	p = 0.8535					Sex Diff*	-10	p = 0.0109
D. bunnanda +	Female	238.3	1.1	5		14028-0721.00	D. flavomontana +	Female	259.5	0.58	5	1N=6	15010-0981.00
	Male	232.5	1.5	5				Male	259.3	0.59	5
	Sex Diff**	11.6	p = 0.0031					Sex Diff	0.4	p = 0.9506
D. capricorni H	Female	211.818	0.312103	5	1N=3	14030-0721.00	D. funebris +	Female	221.1	1.69	5	1N=6	15120-1911.01
	Male	205.363	0.326782	5				Male	219.8	1.37	5
	Sex Diff***	12.9099	p = 0.0009					Sex Diff	1.3	p = 0.4699
D. diplacantha H	Female	273.2	0.83	5		14028-0586.00	D. guarani +	Female	291.3	1.04	5	1N=6	15172-2151.00
	Male	270.4	0.47	5				Male	286.1	1.08	5
	Sex Diff	5.6	p = 0.1428					Sex Diff*	5.2	p = 0.0083
D. elegans +	Female	218.5	1.4	5	1N=5	14027-0461.03	D. guttifera +	Female	186.3	0.69	5	1N=6	15130-1971.03
	Male	217.9	2.7	6				Male	173.2	1.45	5		15130-1971.03
	Sex Diff	1.2	p = 0.7586					Sex Diff****	13.1	p = 0.0001
D. emarginata +	Female	218.4	1.8	6	1N=3	14042-0841.09	D. hydei H	Female	207.4	1.02307	6	1N=6	15085-1641.03
	Male	211.7	1.2	7				Male	199.5	0.876396	6
	Sex Diff****	13.4	p = 0.0001					Sex Diff****	15.8	p = 0.0001
D. equinoxialis H	Female	264.5	0.66	5	1N=3	14030-0741.00	D. hypocausta +	Female	190.6	1.35	5	1N=4	15115-1871.04
	Male	266.4	0.2141	5				Male	185.9	1.02	5
	Sex Diff	-3.8	p = 0.3218					Sex Diff*	4.7	p = 0.0168
D. ercepeae G	Female	223.962	5.868	7	1N=4	-	D. immigrans +	Female	265.2	1.72	6	1N=4	15111-1731.00
	Male	221.028	3.912	5				Male	262.9	0.57	5
	Sex Diff	5.868	p = 0.4886					Sex Diff	2.3	p = 0.2218
D. erecta +	Female	184.2	1.2	5	1N=4	14021-0224.00	D. kanekoi +	Female	256.4	0.74	5	1N=6	15010-1061.00
	Male	184.8	1.4	7				Male	254.4	0.891	6
	Sex Diff	-1.2	p = 0.7093					Sex Diff	4	p = 0.2747
D. eugracilis +	Female	237.8	0.7	5	1N=3	14026-0451.05	D. kepulauana +	Female	224.6	1.19	5	1N=4	15112-1761.03
	Male	237.8	3.3	6				Male	237.3	1.14	5
	Sex Diff	0	p = 0.9928					Sex Diff****	-12.7	p = 0.0001
D. ficusphila +	Female	201.8	1.9	5	1N=4	14025-0441.01	D. kohkoa +	Female	271.9	1.5	5	1N=4	15112-1771.01
	Male	192.8	1.4	5				Male	255.6	1.74	6
	Sex Diff****	18	p = 0.0001					Sex Diff****	16.3	p = 0.0001
D. fuyamai H	Female	266.3	1.49	5		14029-0011.00	D. lacertosa +	Female	298	1.22	5	1N=6	15020-1101.03
	Male	262.5	0.6923	5				Male	303.1	2.02	6
	Sex Diff	7.6	p = 0.05					Sex Diff*	-10.2	p = 0.0064
D. greeni H	Female	244.1	1.7	5	1N=4	14028-0712.00	D. lacicola +	Female	196	1.39	5	1N=6	15010-0991.12
	Male	236.7	0.37	5				Male	192.4	0.4	5
	Sex Diff****	14.8	p = 0.0001					Sex Diff	7.2	p = 0.0591
D. jambulina H	Female	219	0.75	5	1N=4	14028-0671.01	D. limensis +	Female	203.1	1.04	5	1N=6	15084-1591.02
	Male	210.4	1.5	5				Male	192.9	1.33	5
	Sex Diff****	17.2	p = 0.0001					Sex Diff****	20.4	p = 0.0001
D. kanapiae H	Female	168.6	1	5	1N=3	14028-0541.00	D. littoralis +	Female	253.1	0.5	5	1N=5	15010-1001.03
	Male	164.8	0.4198	5				Male	260.1	0.8	5
	Sex Diff	7.6	p = 0.0465					Sex Diff****	-14	p = 0.0003
D. kikkawai +	Female	223	0.6	6	1N=4	14028-0561.08	D. lummei +	Female	312.7	1.69	5	1N=6	15010-1011.07
	Male	223.5	2.6	2				Male	308.5	1.84	5
	Sex Diff	-1	p = 0.8677					Sex Diff*	8.4	p = 0.0311
D. lacteicornis H	Female	248.6	2.44	5	1N=4	14028-0571.00	D. mayaguana +	Female	170	1.55	5		15081-1397.00
	Male	230.7	2.79192	5				Male	161.7	0.88	5
	Sex Diff****	35.8	p = 0.0001					Sex Diff****	16.6	p = 0.0001
D. lucipennis +	Female	274	3	5	1N=3	14023-0331.00	D. mediopictoides +	Female	188	0.67	5	1N=6	15220-2371.00
	Male	274.1	0.9	5				Male	184.3	0.6	5
	Sex Diff	-0.2	p = 0.9342					Sex Diff	7.4	p = 0.0525
D. lutescens +	Female	229.6	2.1	6	1N=4	14022-0271.00	D. melanica +	Female	175.9	1.51	5	1N=5	15030-1141.03
	Male	231.9	2.4	6				Male	175.3	0.8	5
	Sex Diff	-4.6	p = 0.1936					Sex Diff	0.6	p = 0.7489
D. malerkotliana +	Female	221.8	1.2	5	1N=4	14024-0391.00	D. mercatorum +	Female	171.816	0.456966	5	1N=5	15082-1521.00
	Male	215.9	1.6	5				Male	159.084	0.552762	5
	Sex Diff**	11.8	p = 0.0025					Sex Diff****	25.4647	p = 0.0001
D. mauritiana +	Female	164.9	1.8	4	1N=4	14021-0241.109	D. micromelanica +	Female	206.4	1.26	5	1N=5	15030-1151.01
	Male	162.6	2.4	4				Male	207.1	1.46	5
	Sex Diff	4.6	p = 0.2884					Sex Diff	-0.7	p = 0.7102
D. mayri H	Female	262.2	1.27	7	1N=4	14028-0591.00	D. mojavensis G	Female	165.609	2.934	7	1N=6	-
	Male	256.2	0.711364	11				Male	168.681	0.978	12
	Sex Diff****	12	p = 0.0001					Sex Diff	-6.14297	p = 0.4743
D. melanogaster G	Female	174.542	0.978	22	1N=4	4021-0231.36	D. montana +	Female	240.6	1.78	5	1N=6	15010-1021.09
	Male	172.081	0.978	7				Male	242.8	1	5
	Sex Diff	4.923	p = 0.5796					Sex Diff	-4.4	p = 0.2606
D. mimetica G	Female	212.715	2.934	6	1N=4	-	D. mulleri +	Female	168.3	0.76	5	1N=6	15081-1371.01
	Male	208.314	3.912	5				Male	158.9	0.58	5
	Sex Diff	8.802	p = 0.3099					Sex Diff****	18.8	p = 0.0001
D. miranda +	Female	211.9	0.84	5	1N=5	14011-0101.13	D. nannoptera +	Female	245.9	0.74	5	1N=5	15090-1692.11
	Male	199.6	1.59	5				Male	250.1	1.41	5
	Sex Diff****	24.6	p = 0.0001					Sex Diff	-8.4	p = 0.0319
D. narragansett G	Female	205.869	3.912	5	1N=5	-	D. nasuta +	Female	242.4	1.35	5	1N=4	15112-1781.01
	Male	203.424	1.956	6				Male	245.7	1.34	5
	Sex Diff	4.89	p = 0.5639					Sex Diff	-3.3	p = 0.0887
D. nebulosa H	Female	211.5	1.41	5	1N=4	14030-0761.00	D. navojoa +	Female	170	2.02	7		15081-1374.02
	Male	203.1	0.7431	5				Male	156.2	0.79	5
	Sex Diff****	16.8	p = 0.0001					Sex Diff****	27.6	p = 0.0001
D. neocordata H	Female	219	1.03	5	1N=3	14041-0831.00	D. neohypocausta +	Female	165.7	1.42	5	1N=3	15115-1881.00
	Male	219.8	0.571275	5				Male	165.6	0.49	5
	Sex Diff	-1.6	p = 0.6797					Sex Diff	0.1	p = 0.926
D. nikananu H	Female	219.7	1.18	5	1N=4	14028-0601.00	D. novamexicana +	Female	249.31	0.805952	5	1N=6	15010-1031.04
	Male	220.6	0.514934	5				Male	252.663	0.866118	5
	Sex Diff	-1.8	p = 0.6347					Sex Diff	-6.70547	p = 0.0795
D. orena G	Female	280.686	1.956	5		-	D. pachea +	Female	176.5	1.4	5	1N=4	15090-1698.01
	Male	280.686	2.934	5				Male	148.3	0.33	5
	Sex Diff	0	p = 1					Sex Diff****	56.4	p = 0.0001
D. orosa H	Female	215.3	0.99	5	1N=3	14028-0611.01	D. pallidipennis +	Female	330.9	1.3	5	1N=6	15210-2331.01
	Male	216.2	0.7267	5				Male	325	1.47	5
	Sex Diff	-1.8	p = 0.6275					Sex Diff**	11.8	p = 0.0024
D. pallidosa G	Female	194.133	2.934	5	1N=4	-	D. palustris +	Female	219.1	1.53	5	1N=6	15130-2001.00
	Male	186.798	4.89	5				Male	212.1	1.53	5
	Sex Diff	14.67	p = 0.0922					Sex Diff****	14	p = 0.0003
D. parabipectinata +	Female	241	1.17617	5	1N=4	14024-0401.04	D. paramelanica +	Female	192.1	1.32	5	1N=5	15030-1161.03
	Male	235.1	1.10227	6				Male	191.6	1.75	5
	Sex Diff***	11.8	p = 0.0017					Sex Diff	1	p = 0.7646
D. paralutea +	Female	239.2	1.4	5	1N=3	14022-0281.01	D. phalerata +	Female	240.3	0.98	5	1N=6	15130-2031.00
	Male	234.6	1.3	5				Male	233.3	1.9	6
	Sex Diff*	9.2	p = 0.0172					Sex Diff****	14	p = 0.0002
D. paulistorum H	Female	244.7	1.22	5	1N=3	14030-0771.00	D. polychaeta +	Female	202.5	1.05	5	1N=6	15100-1711.00
	Male	250.1	1.52	5				Male	206	1.77	6
	Sex Diff*	-10.8	p = 0.0054					Sex Diff	-7	p = 0.0582
D. pectinifera H	Female	297.442	0.369002	5		14028-0731.00	D. polymorpha +	Female	179.2	0.37	5	1N=4	15181-2231.00
	Male	280.369	0.634927	5				Male	171.2	1.13	6
	Sex Diff****	34.1458	p = 0.0001					Sex Diff****	8	p = 0.0001
D. persimilis G	Female	197.067	7.824	5	1N=5	14011-0111.49	D. pseudotalamancana +	Female	191.6	2.56	4	1N=5	15040-1191.00
	Male	167.727	3.912	5				Male	194.9	0.91	6
	Sex Diff****	58.68	p = 0.0001					Sex Diff	-3.3	p = 0.086
D. phaeopleura G	Female	202.935	3.912	5	1N=4	-	D. repleta +	Female	187.5	0.52	2	1N=6	15084-1611.08
	Male	187.287	0.978	5				Male	165.5	1.11	5
	Sex Diff****	31.296	p = 0.0003					Sex Diff****	44	p = 0.0001
D. prostipennis +	Female	245.5	1.8	4	1N=3	14022-0291.00	D. robusta +	Female	241.6	0.65	5	1N=4	15020-1111.01
	Male	239.8	1.5	5				Male	249.6	1.17	5
	Sex Diff*	11.4	p = 0.0057					Sex Diff****	-16	p = 0.0001
D. pseudoananassae	Female	223.962	5.868	4	1N=5	-	D. rubida +	Female	218.7	1.32	5	1N=4	15115-1901.03
nigrens G	Male	223.962	2.934	6				Male	213.42	0.76	5
	Sex Diff	0	p = 1					Sex Diff*	5.28	p = 0.0069
D. pseudoananassae +	Female	223.6	1.6	5	1N=5	14024-0411.00	D. sordidula +	Female	227.6	0.71	5	1N=5	15020-1121.01
	Male	215.5	2.5	5				Male	229.3	1.61	5
	Sex Diff****	16.2	p = 0.0002					Sex Diff	-3.4	p = 0.3803
D. pseudoobscura H	Female	180.8	1.22	5	1N=5	14011-0121.32	D. subpalustris +	Female	214.7	0.53	5	1N=6	15130-2071.01
	Male	161.3	1.59	5				Male	212.2	0.76	5
	Sex Diff****	39	p = 0.0001					Sex Diff	5	p = 0.2007
D. pseudotakahashii G	Female	212.226	1.956	6	1N=4	-	D. tripunctata +	Female	184.4	0.84	5		15220-2401.02
	Male	202.935	1.956	5				Male	184.5	1.31	5
	Sex Diff	18.582	p = 0.8571					Sex Diff	-0.2	p = 0.9835
D. punjabiensis H	Female	200	0.44	5	1N=4	14028-0641.00	D. virilis G	Female	325.377	0.978	17	1N=6	-
	Male	194.9	0.353175	5				Male	338.152	0.978	5
	Sex Diff*	10.2	p = 0.0086					Sex Diff**	-25.5512	p = 0.0032
D. quadraria H	Female	252.125	0.432648	5	1N=3	-	H. pictiventris G	Female	162.837	8.802	7		-
	Male	248.427	0.889489	5				Male	142.299	4.89	5
	Sex Diff	7.39622	p = 0.0591					Sex Diff****	41.076	p = 0.0001
D. rufa H	Female	256.8	0.61	5	1N=4	14028-0661.03	S. leonensis H	Female	261.818	3.46593	7	1N=4	80000-2761.03
	Male	246	0.219834	5				Male	260.394	1.54289	5
	Sex Diff****	21.6	p = 0.0001					Sex Diff	2.84623	p = 0.7466
D. santomea +	Female	181.9	1.8	5		14021-0271.00	S. latifasciaeformis +	Female	201.7	1.9	5		11030-0061.01
	Male	178.3	1.5	5				Male	201.8	1.4	5
	Sex Diff	7.2	p = 0.0663					Sex Diff	-0.2	p = 0.8607
D. sechellia +	Female	208.3	2.8	7	1N=4	14021-0248.21	S. anomala +	Female	200.2	1.67	5		33000-2661.01
	Male	190.9	1.2	5				Male	193.1	1.32	5
	Sex Diff****	34.8	p = 0.0001					Sex Diff****	14.2	p = 0.0002
D. seguyi H	Female	249.1	0.55	5	1N=4	14028-0671.02	Z. bogoriensis +	Female	224.3	1.25	4	1N=6	52000-2752.00
	Male	245.3	0.9732	5				Male	226.9	0.69	6
	Sex Diff	7.6	p = 0.0512					Sex Diff	-5.2	p = 0.1915
D. serrata H	Female	226.7	1.22	5	1N=4	14028-0681.00	Z. ghesquierei +	Female	174.5	0.56	5	1N=6	50000-2743.00
	Male	215.8	1.51	4				Male	174.9	0.92	5
	Sex Diff****	21.8	p = 0.0001					Sex Diff	-0.8	p = 0.8445
D. simulans +	Female	168.9	0.9	6	1N=4	14021-0251.001	Z. indianus +	Female	234.8	1.03	5	1N=6	50001-1031.09
	Male	163.8	0.5	5				Male	229.9	0.5	5
	Sex Diff*	10.2	p = 0.0061					Sex Diff*	9.8	p = 0.0115
D. sucinea H	Female	215.1	0.84	6	1N=3	14030-0791.01	Z. inermis +	Female	203.1	1.11	5	1N=6	50000-2746.00
	Male	211.3	0.98	5				Male	202	0.78	4
	Sex Diff	7.6	p = 0.0368					Sex Diff	2.2	p = 0.5975
D. suzukii H	Female	342.786	1.08377	5	1N=4	14023‑0311.00	Z. kolodkinae +	Female	199.3	1.55	5		50000-2748.00
	Male	333.343	1.00994	5				Male	195.5	1.66	7
	Sex Diff****	18.8859	p = 0.0001					Sex Diff	7.6	p = 0.0336
D. takahashii +	Female	210.8	1.1	5	1N=4	14022-0311.00	Z. lachaisei +	Female	194.3	1.21	5		50002-2750.00
	Male	204	2.7	5				Male	187.7	1.07	5
	Sex Diff***	13.6	p = 0.0004					Sex Diff***	13.2	p = 0.0006
D. tani H	Female	211.5	1.54	6		14020-0011.01	Z. sepsoides +	Female	211.8	1.8	5	1N=6	50000-2744.02
	Male	200.75	1.5373	5				Male	210.2	2.2	5
	Sex Diff****	21.5	p = 0.0001					Sex Diff	3.2	p = 0.4089
D. teissieri H	Female	165	1.52	5	1N=4	14021-0257.01	Z. taronus +	Female	203.2	1.12	5		50001-1020.00
	Male	162.9	1.43	5				Male	199.9	1.25	5
	Sex Diff	4.2	p = 0.2972					Sex Diff	6.6	p = 0.0849
D. tolteca G	Female	178.974	0.978	5	1N=5	-	Z. tsacasi +	Female	221.8	1.67	5		50000-2751.00
	Male	168.705	0.978	5				Male	221.1	1.37	7
	Sex Diff*	20.538	p = 0.0176					Sex Diff	1.4	p = 0.7224
D. triauraria H	Female	256.7	0.84	6	1N=3	14028-0651.00	Z. tuberculatus +	Female	198.1	1.1	5	1N=6	50001-0001.02
	Male	252.4	0.3702	5				Male	199.2	2.3	5
	Sex Diff*	8.6	p = 0.0206					Sex Diff	-2.2	p = 0.5702
D. tsacasi H	Female	224.8	0.88	5	1N=4	14028-0701.00	Outgroups
	Male	211.5	1.2119	5			C. amoena G	Female	395.171	3.912	5	1N=4	20010-2010.00
	Sex Diff****	26.6	p = 0.0001					Male	384.785	3.912	4
D. varians G	Female	166.749	2.934	6	1N=4	-		Sex Diff*	20.7724	p = 0.0112
	Male	155.991	4.89	4			C. procnemis +	Female	298.2	1.2	5	1N=4	20000-2631.01
	Sex Diff*	21.516	p = 0.0136					Male	262.4	1.07	5
D. vulcana H	Female	226	1.38	5	1N=4	14028-0711.00		Sex Diff****	71.6	p = 0.0001
	Male	221.1	0.5221	9			S. lebanonensis +	Female	257.2	1.7	5		11010-0021.00
	Sex Diff**	9.8	p = 0.0045					Male	253.3	1.9	5
D. yakuba +	Female	180.6	1.4	6	1N=4	14021-0261.00		Sex Diff	7.8	p = 0.0465
	Male	178.9	1.2	8			S. pattersoni +	Female	251.9	2	6		11010-0031.00
	Sex Diff	3.4	p = 0.3199					Male	256.9	1.6	5
H. duncani +	Female	251.6	0.39	5		92000-0075.00		Sex Diff*	-10	p = 0.0078
	Male	244.3	0.65	5			S. stonei G	Female	206.847	5.868	5		-
	Sex Diff****	14.6	p = 0.0002					Male	208.314	2.934	5
Sex Diff. Sig after B-H Correction: '*' 0.05, '**' 0.01,'***' 0.001, '****' 0.0001								Sex Diff	-2.934	p = 0.7291
Species GS Reference: '+' Newly Updated or Added, 'H' Hjelmen et al 2018, 'G' Gregory and Johnston 2008

## Sheet: Sheet2
		Sex Diff. Sig after B-H Correction: '*' 0.05, '**' 0.01,'***' 0.001, '****' 0.0001
Species GS Reference: '+' Newly Updated or Added, 'H' Hjelmen et al 2018, 'G' Gregory and Johnston 2008
